# Supplementary material for: Suppression of PF6− intercalation into graphite by small amounts of ethylene carbonate in activated carbon/graphite capacitors
Source: Royal Society of Chemistry journal article supplement (doi:10.1039/b914931g), 2010-01-01
Supplement: b914931g.pdf [file b914931g.pdf]

Supplementary figures for Electronic-Supporting Information

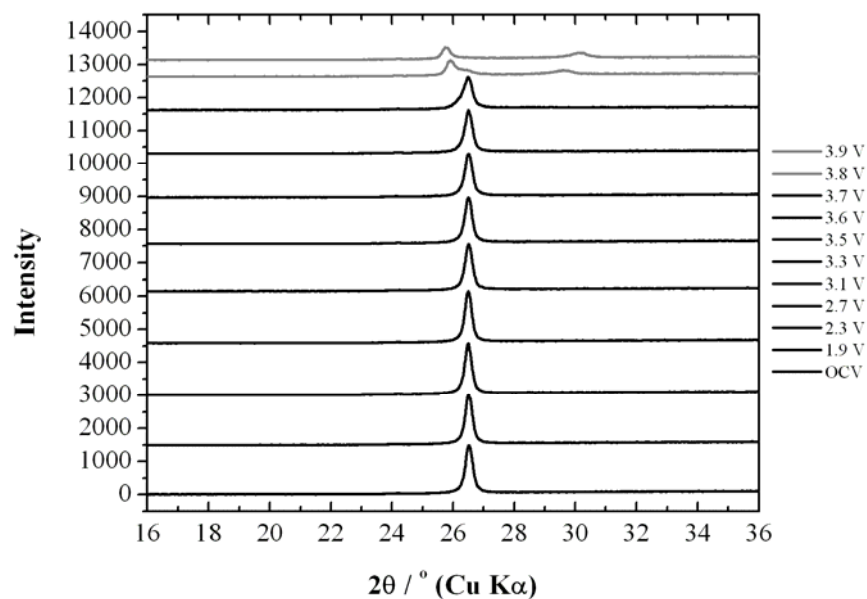

**Fig. S1a** *in situ* XRD patterns of the KS6 positive electrode in the capacitors using the electrolyte solutions of 1.5M SBPBF<sub>6</sub> dissolved in PC.

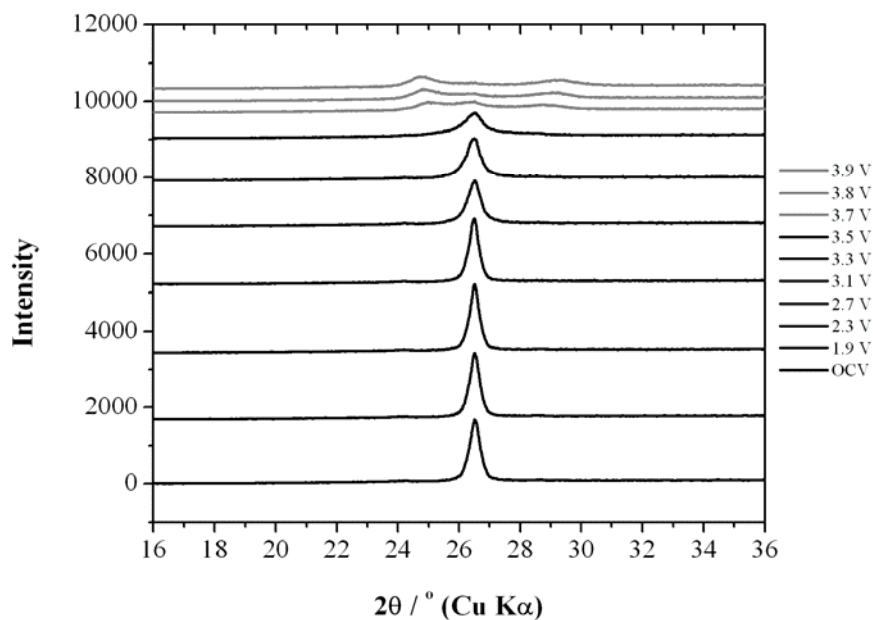

**Fig. S1b** *in situ* XRD patterns of the KS6 positive electrode in the capacitors using the electrolyte solutions of 1.5M SBPBF<sub>6</sub> dissolved in EC.
